# Supplementary material for: Mapping Potential Vaccine Candidates Predicted by VaxiJen for Different Viral Pathogens between 2017–2021—A Scoping Review
Source: MDPI journal article supplement (doi:10.3390/vaccines10111785), 2022-10-24
Supplement: s1 [file s1]

## Supplementary File S1

**Table S1: Search strategy per database**

| <b>Database</b>       | <b>Search strategy</b>                                                                                                                                                                                                                            |
|-----------------------|---------------------------------------------------------------------------------------------------------------------------------------------------------------------------------------------------------------------------------------------------|
| PubMed                | Search term: "vaxijen"<br>Language: English<br>Publication date: from 2017 to 2021                                                                                                                                                                |
| Scopus                | ALL ("vaxijen") AND (LIMIT-TO (PUBYEAR, 2021) OR LIMIT-TO (PUBYEAR, 2020) OR LIMIT-TO (PUBYEAR, 2019) OR LIMIT-TO (PUBYEAR, 2018) OR LIMIT-TO (PUBYEAR, 2017)) AND (LIMIT-TO (DOCTYPE, "ar")) AND (LIMIT-TO (LANGUAGE, "English"))                |
| Web of Science        | ((ALL=("vaxijen")) AND PY=(2017-2021)) AND DT=(Article) AND LA=(English)                                                                                                                                                                          |
| EBSCOhost             | "vaxijen" (All Fields)<br>Language: English<br>Published date: start year: 2017; end year: 2021<br>Publication type: academic journal, primary source document, working paper<br>Document type: article, journal article, research, working paper |
| ProQuest One Academic | "vaxijen" (Anywhere - all fields)<br>Language: English<br>Date: from 2017 to 2021<br>Document type: article, working paper/pre-print                                                                                                              |
